# Supplementary material for: Farming for Life Quality and Sustainability: A Literature Review of Green Care Research Trends in Europe
Source: MDPI journal article supplement (doi:10.3390/ijerph15061282), 2018-06-17
Supplement: s1 [file s1]

## Supplementary material

Table S1. Publications included in the systematic review.

| Title                                                                                                                                                | Authors                | Publication year | Journal                                               |
|------------------------------------------------------------------------------------------------------------------------------------------------------|------------------------|------------------|-------------------------------------------------------|
| Horticultural therapy- aspects of land use for the mentally handicapped system of planning for the requirements of the mentally-handicapped gardener | Spurgeon and Underhill | 1979             | International Journal of Rehabilitation Research      |
| Horticultural therapy: Horticulture's contribution to the quality of life of disable people                                                          | Stoneham et al.        | 1995             | Acta Horticulturae                                    |
| Therapeutics gardens                                                                                                                                 | Ousset et al.          | 1998             | Archives of Gerontology and Geriatrics                |
| Plants in health care environments: Experiences of the nursing personnel in homes for people with dementia                                           | Rappe and Lindén       | 2004             | Acta Horticulturae                                    |
| 'Cultivating health': therapeutic landscapes and older people in northern England                                                                    | Milligan et al.        | 2004             | Social Science and Medicine                           |
| The paradox of the "green" prison: Sustaining the environment or sustaining the penal complex?                                                       | Jewkes and Moran       | 2005             | Theoretical Criminology                               |
| Day care for demented elderly in a dairy farm setting: Positive first impressions                                                                    | Schols et al.          | 2006             | Journal of the American Medical Directors Association |
| The association between indoor plants, stress productivity and sick leave in office workers                                                          | Bringslimark et al.    | 2006             | Acta Horticulturae                                    |
| Current status and potential of care farms in the Netherlands                                                                                        | Hassink et al.         | 2007             | Wageningen Journal of Life Science                    |
| Values of rural landscapes in Europe: inspiration of or-product?                                                                                     | Pedroli et al.         | 2007             | Wageningen Journal of Life Science                    |
| Attitudes to animal-assisted therapy with farm animals among health staff and farmer                                                                 | Berget et al.          | 2008             | Journal of Psychiatric and Mental Health Nursing      |
| Day care at Green Care Farms: A novel way to simulate dietary intake of community-dwelling older people with dementia?                               | De Bruin et al.        | 2010             | The Journal of Nutrition, Health, Aging               |
| An exploratory study of the rehabilitation process of people with stress-related-disorders                                                           | Eriksson et al.        | 2010             | Scandinavian Journal of Occupational Therapy          |
| Therapeutic horticulture in clinical depression: a prospective study of active components                                                            | González et al.        | 2010             | Journal of Advanced Nursing                           |
| Care farm in the Netherlands: Attractive empowerment oriented and strength based                                                                     | Hassink et al.         | 2010             | Health and Place Practices in the Community           |
| Effects of an indoor foliage plants intervention on patient well-being during a residential rehabilitation program                                   | Raanaas et al.         | 2010             | Hort Science                                          |
| The development of green care in western European countries                                                                                          | Haubenhof et al.       | 2010             | Explore-the Journal of Science and Healing            |
| Gardening and belonging: reflections on how social and therapeutic horticulture may facilitate health, wellbeing and inclusion                       | Diamant and Waterhouse | 2010             | British Journal of Occupational Therapy               |
| Social co-operatives and social farming in Italy                                                                                                     | Fazzi                  | 2011             | Sociologia Ruralis                                    |
| Impact of support centres for social farming on benefits from livestock in northern Europe                                                           | Schuessler et al.      | 2011             | Outlook on Agriculture                                |

| Title                                                                                                                                                                                  | Authors                       | Publication year | Journal                                                         |
|----------------------------------------------------------------------------------------------------------------------------------------------------------------------------------------|-------------------------------|------------------|-----------------------------------------------------------------|
| A prospective study of existential issues in therapeutic horticulture for clinical depression                                                                                          | González et al.               | 2011             | International Journal of Mental Health Nursing                  |
| Comparing day care at green care farms and at regular day care facilities with regard to their effects on functional performance of community-dwelling older people with dementia      | De Bruin et al.               | 2011             | Dementia                                                        |
| Experiences of women with stress-related ill health in a therapeutic gardening program                                                                                                 | Eriksson et al.               | 2011             | Canadian Journal of Occupational Therapy-<br>revue Canadienne D |
| Animal-assisted therapy with farm animals for persons with psychiatric disorders                                                                                                       | Berget and Braastad           | 2011             | Annali dell'Istituto Superiore di Sanita                        |
| Farm animal-assisted intervention: relationship between work and contact with farm animals and change in depression, anxiety, and self-efficacy among persons with clinical depression | Pedersen et al.               | 2011             | Issues in Mental Health Nursing                                 |
| A comparison of children with ADHD in a natural and built-setting                                                                                                                      | Van den Berg and Van den Berg | 2011             | Child Care Health and Development                               |
| Care farms as a short-break service for children with Autism Spectrum Disorder                                                                                                         | Van Zoneveld et al.           | 2012             | Wageningen Journal of Life Science                              |
| Care farms in the Netherlands: An underexplored example of multifunctional agriculture-toward an empirically grounded, organization theory-based typology                              | Hassink et al.                | 2012             | Rural Sociology                                                 |
| Important elements in farm animal-assisted interventions for persons with clinical depression: A qualitative interview study                                                           | Pedersen et al.               | 2012             | Disability and Rehabilitation                                   |
| The value of an allotment group for refugees                                                                                                                                           | Bishop and Purcell            | 2012             | British Journal of Occupational Therapy                         |
| Primary-care based participatory rehabilitation: User's view of a horticultural and arts project                                                                                       | Barley et al.                 | 2012             | British Journal of General Practice                             |
| Horticultural therapy for patients with chronic musculoskeletal pain: Results of a pilot study                                                                                         | Verra et al.                  | 2012             | Alternative Therapies in Health and Medicine                    |
| The economic impact of agriculture in Dutch regions: An input-output model                                                                                                             | Heringa et al.                | 2013             | NJAS-Wageningen Journal of Life Science                         |
| Stress rehabilitation through garden therapy: The garden as a place in the recovery from stress                                                                                        | Adevi and Mårtensson          | 2013             | Urban Forestry and Urban Greening                               |
| Multifunctional agriculture meets health Care: Applying the multi-level transition sciences perspective to care farming in the Netherlands                                             | Hassink et al.                | 2013             | Sociologia Ruralis                                              |
| Multifunctionality and care farming: Contested discourses and practices in Flanders                                                                                                    | De Krom and Dessein           | 2013             | NJAS-Wageningen Journal of Life Science                         |
| Investigating the limits of multifunctional agriculture as the dominant frame for Green Care in agriculture in Flanders and the Netherlands                                            | Dessein et al.                | 2013             | Journal of Rural Studies                                        |
| Mental health recovery on care farms and                                                                                                                                               | Iancu et al.                  | 2013             | Disability and                                                  |

| Title                                                                                                                                                                                                                                                                      | Authors                        | Publication year | Journal                                                           |
|----------------------------------------------------------------------------------------------------------------------------------------------------------------------------------------------------------------------------------------------------------------------------|--------------------------------|------------------|-------------------------------------------------------------------|
| day care centres: a qualitative comparative study of user's perspectives                                                                                                                                                                                                   |                                |                  | Rehabilitation                                                    |
| Does a structured gardening programme improve well-being in young onset dementia? A preliminary study                                                                                                                                                                      | Hewitt et al.                  | 2013             | British Journal of Occupational Therapy                           |
| How effective is the Forestry Commission Scotland's woodland improvement programme 'Woods In and Around Towns' (WIAT)—at improving psychological well-being in deprived urban communities? A quasi-experimental study                                                      | Silveirinha de Oliveira et al. | 2013             | BMJ Open                                                          |
| The effects of social and therapeutic horticulture on aspects of social behaviour                                                                                                                                                                                          | Sempik et al.                  | 2014             | British Journal of Occupational Therapy                           |
| Outdoor environments in healthcare settings: A quality evaluation tool for use in designing healthcare gardens                                                                                                                                                             | Bengtsson and Grahn            | 2014             | Urban Forestry and Urban Greening                                 |
| Farming with care: the evolution of care farming in Netherlands                                                                                                                                                                                                            | Hassink et al.                 | 2014             | NJAS-Wageningen Journal of Life Science                           |
| Rehabilitation of individuals on long-term sick leave due to sustained stress-related symptoms: A comparative follow-up study                                                                                                                                              | Willert et al.                 | 2014             | Scandinavian Journal of Public Health                             |
| Changes in experienced value of everyday occupations after nature-based vocational rehabilitation                                                                                                                                                                          | Pálsdóttir et al.              | 2014             | Scandinavian Journal of Public Health                             |
| Agriculture- Who cares? An Investigating of care farming in the UK                                                                                                                                                                                                         | Leck et al.                    | 2014             | Journal of Rural Studies                                          |
| Nature-assisted rehabilitation for reactions to severe stress and/or depression in a rehabilitation for reactions to severe stress and/or depression in a rehabilitation garden long-term follow-up including comparisons with a matched population-based reference cohort | Währborg et al.                | 2014             | Journal of Rehabilitation Medicine                                |
| The journey of recovery an empowerment embraced by nature. Client's perspective on nature-based rehabilitation in relation to the role of the natural environment                                                                                                          | Pálsdóttir et al.              | 2014             | International Journal of Environmental Research and Public Health |
| Narratives of natural recovery: Youth experience of social inclusion though garden care                                                                                                                                                                                    | Kogstad et al.                 | 2014             | International Journal of Environmental Research and Public Health |
| Outsourcing mental health care services? The practice and potential of community-based Farms in psychiatric rehabilitation                                                                                                                                                 | Iancu et al.                   | 2014             | Community Ment Health J                                           |
| Understanding the impacts of care farms on health and well-being of disadvantage populations: a protocol of the Evaluating Community Orders (ECO) pilot study                                                                                                              | Elsey et al.                   | 2014             | BMJ Open                                                          |
| Decentralisation of long-term care in Netherlands: the case of day care at green care farms for people with dementia                                                                                                                                                       | Nowak et al.                   | 2015             | Ageing and Society                                                |
| Can rehabilitation in boreal forests help recovery from exhausting disorder? The randomised clinical trial forest                                                                                                                                                          | Sonntag-Öström et al.          | 2015a            | Scandinavian Journal of Forest Research                           |
| "Nature's effect on my mind" Patient's qualitative experiences of a forest-based                                                                                                                                                                                           | Sonntag-Öström et al.          | 2015b            | Urban Forestry and Urban Greening                                 |

| Title                                                                                                                                                                                                 | Authors                  | Publication year | Journal                                                           |
|-------------------------------------------------------------------------------------------------------------------------------------------------------------------------------------------------------|--------------------------|------------------|-------------------------------------------------------------------|
| rehabilitation programme                                                                                                                                                                              |                          |                  |                                                                   |
| Diversification and re-feminisation of Norwegian Farm Properties                                                                                                                                      | Heggem                   | 2015             | Sociologia Ruralis                                                |
| Green care from the provider's perspective: An insecure position facing different social worlds                                                                                                       | Lund et al.              | 2015             | SAGE Open                                                         |
| New practices of farm-based community-oriented social care services in The Netherlands                                                                                                                | Hassink et al.           | 2015             | Journal of Social Service Research                                |
| Guidelines for the design of a healing garden for the rehabilitation of psychiatric patients                                                                                                          | Erbino et al.            | 2015             | Journal of Agricultural Engineering                               |
| Farming families as foster families: The findings of an exploratory study on care farming in Switzerland                                                                                              | Bombach et al.           | 2015             | International Journal of Child, Youth and Family Studies          |
| Using nature-based rehabilitation to restart a stalled process of rehabilitation in individuals with stress- related mental illness                                                                   | Shalin et al.            | 2015             | International Journal of Environmental Research and Public Health |
| The significance of experiences of nature for people with Parkinson's Disease, with special focus on freezing of gait— The necessity for a biophilic Environment. A multi-method single subject study | Ottosson et al.          | 2015             | International Journal of Environmental Research and Public Health |
| Sowing the seeds or failing to blossom? A feasibility study of a simple ecotherapy-based intervention in women affected by breast cancer                                                              | Phelps et al.            | 2015             | Ecancermedalscience                                               |
| Growing well-beings: The Positive experience of care farms                                                                                                                                            | Leck et al.              | 2015             | British Journal of Health Psychology                              |
| Living at the farm, innovating nursing home care for people with dementia- study protocol of an observational longitudinal study                                                                      | De Boer et al.           | 2015             | BMC Geriatrics                                                    |
| Potential use of <i>Mucor circinelloides</i> for the biological control of certain helminths affecting livestock reared in a care farm                                                                | Cortiñas et al.          | 2015             | Biocontrol Science and Technology                                 |
| Farm animal-assisted intervention for people with clinical depression: A randomized controlled trial                                                                                                  | Pedersen et al.          | 2015             | Anthrozoös                                                        |
| Motivations, experiences and challenges of being a care farmer- results of a survey of Norwegian care farmers                                                                                         | Ihlebaeck et al.         | 2016             | Work-A Journal of Prevention Assessment and Rehabilitation        |
| Autonomy support and need satisfaction in prevocational programs on care farms: the self-determination theory perspective                                                                             | Ellingsen-Dalskau et al. | 2016             | Work-A Journal of Prevention Assessment and Rehabilitation        |
| Content and key components of vocational rehabilitation on care farms for unemployed people with mental health problems: A case study report                                                          | Pedersen et al.          | 2016             | Work-A Journal of Prevention Assessment and Rehabilitation        |
| Social farming in the promotion of social-ecological sustainability in rural and periurban areas                                                                                                      | García-Llorente et al.   | 2016             | Sustainability                                                    |
| Gardening is beneficial for adult mental health: Scottish Health Survey, 2012-2013                                                                                                                    | Shiue                    | 2016             | Scandinavian Journal of Occupational Therapy                      |
| What does care farming provide for clients? The views of care farm staff                                                                                                                              | Hemingway et al.         | 2016             | NJAS- Wageningen Journal of Life Science                          |

| Title                                                                                                                                                                                      | Authors                  | Publication year | Journal                                                           |
|--------------------------------------------------------------------------------------------------------------------------------------------------------------------------------------------|--------------------------|------------------|-------------------------------------------------------------------|
| Design of evidence-based gardens and garden therapy for neurodisability in Scandinavia: data from 14 sites                                                                                 | Spring                   | 2016             | Neurodegenerative Disease Management                              |
| Entrepreneurship in agriculture and healthcare: Different entry strategies of care farmers                                                                                                 | Hassink et al.           | 2016a            | Journal of Rural Studies                                          |
| Identity formation and strategy development in overlapping institutional fields. Different entry & alignment strategies of regional organizations of care farms into the healthcare domain | Hassink et al.           | 2016b            | Journal of Organizational Change Management                       |
| The role of soundscape in nature-based rehabilitation: A patient perspective                                                                                                               | Cerwen et al.            | 2016             | International Journal of Environmental Research and Public Health |
| Measuring the effects of transdisciplinary research: the case of a social farming project                                                                                                  | Di Iacovo et al.         | 2016             | Futures                                                           |
| Understanding how prevocational training on care farms can lead to functioning, motivation and well-being                                                                                  | Ellingsen-Dalskau et al. | 2016             | Disability and Rehabilitation                                     |
| Green fingers and clear minds: prescribing "care farming" for mental illness                                                                                                               | Elsey et al.             | 2016             | British Journal of General Practice                               |
| The influence of therapeutic horticulture on social integration                                                                                                                            | Howart et al.            | 2016             | Journal of Public Mental Health                                   |
| From green space to green prescriptions: challenges and opportunities for research and practice                                                                                            | Van der Berg             | 2017             | Frontiers in Psychology                                           |
| Care farms as a space of wellbeing for people with a learning disability in the United Kingdom                                                                                             | Rotheram et al.          | 2017             | Health and Place                                                  |
| Social farming in Catalonia: Rural local development, employment opportunities and empowerment for people at risk of social exclusion                                                      | Guirado et al.           | 2017             | Journal of Rural Studies                                          |
| Exploring the role of farm animals in providing care at care farms                                                                                                                         | Hassink et al.           | 2017             | Animals                                                           |
| Green care farms as innovative nursing homes, promoting activities and social interaction for people with dementia                                                                         | de Boer et al.           | 2017a            | Journal of the American Medical Directors Association             |
| Quality of care and quality of life of people with dementia living at green care farms: a cross-sectional study                                                                            | de Boer et al.           | 2017b            | BMC Geriatric                                                     |
| Smelling therapeutic landscapes: Embodied encounters within spaces of care farming                                                                                                         | Gorman and Cacciatore    | 2017             | Health and Place                                                  |
| The location matters: Determinants for "deepening" and "broadening" diversification strategies in Ruhr metropolis' urban farming                                                           | Pölling and Mergenthaler | 2017             | Sustainability                                                    |
| Collaboration, knowledge and innovation toward a welfare society: the case of the Board of Social Farming in Valdera (Tuscany), Italy                                                      | Di Iacovo et al.         | 2017             | Journal of Agricultural Education and Extension                   |
| Business models in urban farming: a comparative analysis of case studies from Spain Italy and Germany                                                                                      | Pölling et al.           | 2017             | Moravian Geographical Reports                                     |
| The development of social farming in Italy: A                                                                                                                                              | Dell'Olio et al.         | 2017             | Journal of Rural Studies                                          |

| Title                                                                                                                                      | Authors         | Publication year | Journal                                                           |
|--------------------------------------------------------------------------------------------------------------------------------------------|-----------------|------------------|-------------------------------------------------------------------|
| qualitative inquiry across four regions                                                                                                    |                 |                  |                                                                   |
| The social dimensions of therapeutic horticulture                                                                                          | Harris          | 2017             | Health and the Social Care in the Community                       |
| Longer nature-based rehabilitation may contribute to a faster return to work in patients with reactions to severe stress and/or depression | Grahn et al.    | 2017             | International Journal of Environmental Research and Public Health |
| A diagnostic post-occupancy evaluation of the Nacadia Therapy Garden                                                                       | Sidenius et al. | 2017             | International Journal of Environmental Research and Public Health |
| 'The nourishing soil of the soul': The role of horticultural therapy in promoting well-being in community-dwelling people with dementia    | Noone et al.    | 2017             | Dementia                                                          |
| Stress recovery in forest or handicraft environments – An intervention study                                                               | Dolling et al.  | 2017             | Urban Forestry and Urban Greening                                 |
| Rural–urban business partnerships-Towards a new trans-territorial logic                                                                    | Hjalager        | 2017             | Local Economy                                                     |
| Therapeutic landscapes and non-human animals: the roles and contested positions of animals within care farming assemblages                 | Gorman          | 2017             | Social and Cultural Geography                                     |
